# Supplementary material for: Prediction of Stroke Outcome Using Natural Language Processing-Based Machine Learning of Radiology Report of Brain MRI
Source: MDPI journal article supplement (doi:10.3390/jpm10040286), 2020-12-16
Supplement: s1 [file s1]

## Radiology Report of Brain Magnetic Resonance Image and Angiography

|                                                                                                                                                                                                                                                                                                                                                                                                                                                                                                                                                                                                                                                                                                                                                                                                                                     |                                                                                   |               |                   |
|-------------------------------------------------------------------------------------------------------------------------------------------------------------------------------------------------------------------------------------------------------------------------------------------------------------------------------------------------------------------------------------------------------------------------------------------------------------------------------------------------------------------------------------------------------------------------------------------------------------------------------------------------------------------------------------------------------------------------------------------------------------------------------------------------------------------------------------|-----------------------------------------------------------------------------------|---------------|-------------------|
| Hospital ID                                                                                                                                                                                                                                                                                                                                                                                                                                                                                                                                                                                                                                                                                                                                                                                                                         | 000000000                                                                         | Name          | 00000<br>00000000 |
| Referring physician                                                                                                                                                                                                                                                                                                                                                                                                                                                                                                                                                                                                                                                                                                                                                                                                                 | Dr. 0000000                                                                       | Reported by   | Dr. 0000000       |
| Referring date                                                                                                                                                                                                                                                                                                                                                                                                                                                                                                                                                                                                                                                                                                                                                                                                                      | 0000 / 00 / 00                                                                    | Examined date | 0000 / 00 / 00    |
| <p>■ Brain MRI sequence: Acute stroke sequence</p> <p>T1/T2WI, FLAIR, GRE, DWI ADC map, TOF MRA, CE MRA (intracranial and neck)</p>                                                                                                                                                                                                                                                                                                                                                                                                                                                                                                                                                                                                                                                                                                 |                                                                                   |               |                   |
| <p>■ Clinical information:</p> <p>Left side weakness (2 hours ago)</p>                                                                                                                                                                                                                                                                                                                                                                                                                                                                                                                                                                                                                                                                                                                                                              |                                                                                   |               |                   |
| <p>■ Findings:</p> <p>Diffusion restriction in right medial frontal cortex, right cingulate gyrus, right basal ganglia, right frontotemporal and right parietal cortex</p> <ul style="list-style-type: none"> <li>- multifocal acute infarctions</li> <li>- multifocal hemorrhagic transformation of right basal ganglia , right insular gyrus and right subinsular white matter</li> <li>- No evidence of tumor, hydrocephalus, brain atrophy</li> </ul> <p>MRA</p> <ul style="list-style-type: none"> <li>- Focal severe vaso-occlusion of right proximal ACA (A1 portion)</li> <li>- R/O focal vaso-occlusion of right subclavian artery (third portion)</li> <li>- No evidence of aneurysm in Willis circle and cavernous ICA</li> <li>- No evidence of vaso-occlusion, stenosis in Willis circle and neck carotid A</li> </ul> |                                                                                   |               |                   |
| Conclusions                                                                                                                                                                                                                                                                                                                                                                                                                                                                                                                                                                                                                                                                                                                                                                                                                         | Multiple acute infarctions in right MCA territory with hemorrhagic transformation |               |                   |
| Recommendation                                                                                                                                                                                                                                                                                                                                                                                                                                                                                                                                                                                                                                                                                                                                                                                                                      | Clinical correlation                                                              |               |                   |
| Confirmed date                                                                                                                                                                                                                                                                                                                                                                                                                                                                                                                                                                                                                                                                                                                                                                                                                      | 0000 / 00 / 00                                                                    |               |                   |
| Confirmed Dr.                                                                                                                                                                                                                                                                                                                                                                                                                                                                                                                                                                                                                                                                                                                                                                                                                       | by Dr.                                                                            |               |                   |

Supplemental Figure S1. Example of brain MRI radiology text report.

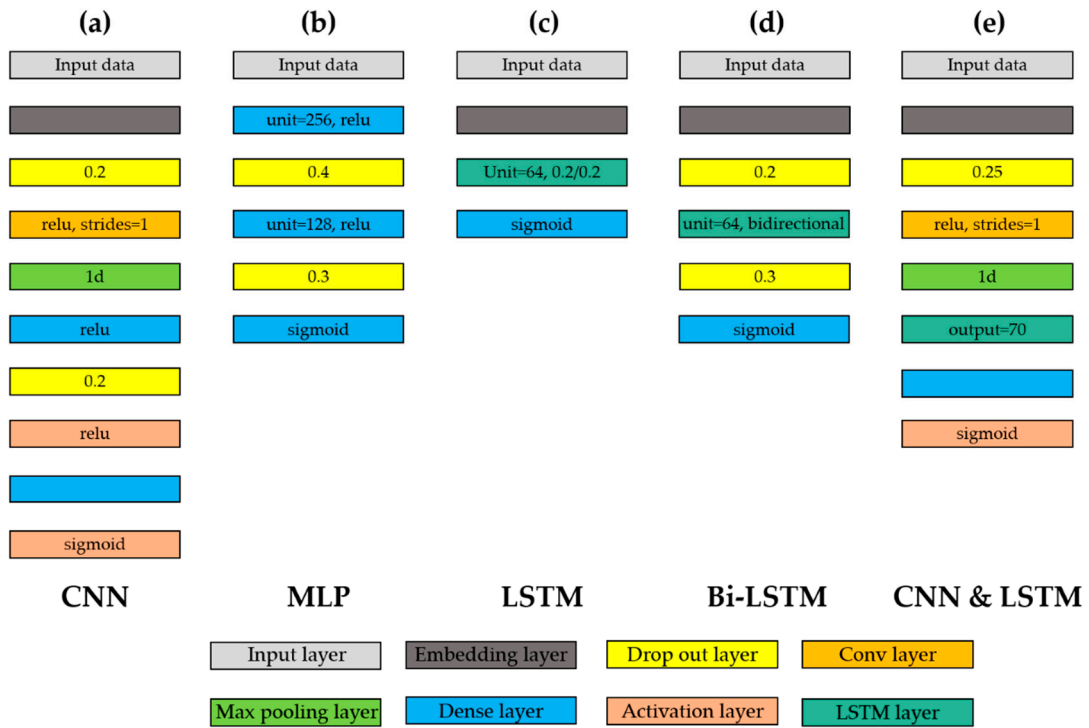

**Supplemental Figure S2.** Detailed architecture of the ‘bag of words’ model in word level approach. CNN, convolutional neural network; MLP, multilayer perceptron; LSTM, long short-term memory; Bi-LSTM, bidirectional LSTM.

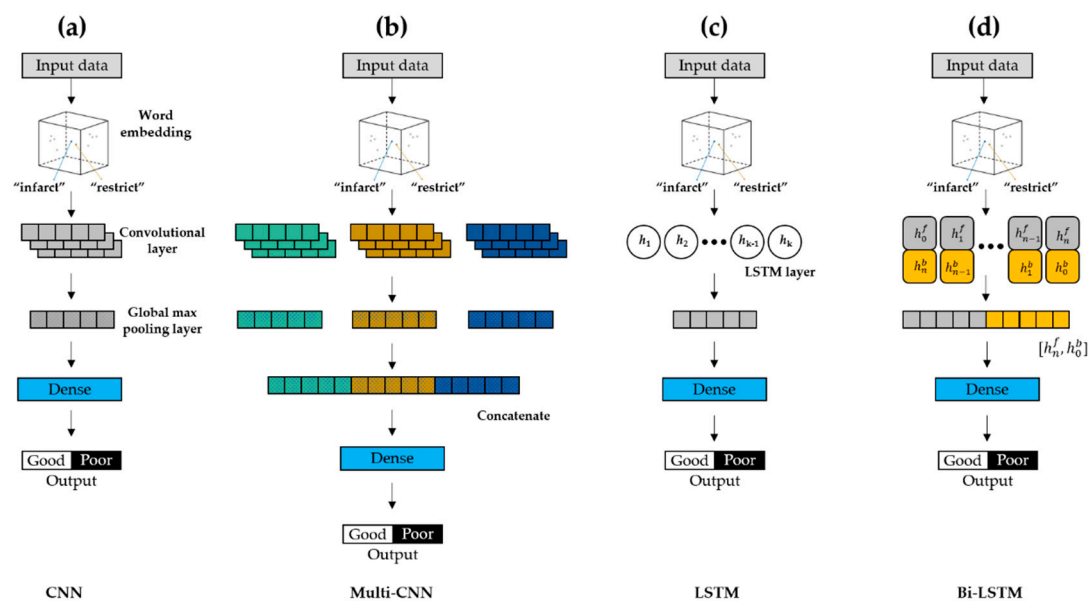

**Supplemental Figure S3.** Detailed architecture of the deep learning algorithms in document level approach.

CNN, convolutional neural network; Multi-CNN, multi kernel CNN; LSTM, long short-term memory; Bi-LSTM, bidirectional LSTM.

**Supplemental Table S1.** Most frequently used word tokens in brain MRI text dataset.

| Token    | Rank                     |                          |                         |
|----------|--------------------------|--------------------------|-------------------------|
|          | Whole dataset            | Test dataset             | Training dataset        |
| left     | 1 <sup>st</sup> (5,236)  | 1 <sup>st</sup> (3,720)  | 1 <sup>st</sup> (1,516) |
| right    | 2 <sup>nd</sup> (5,101)  | 2 <sup>nd</sup> (3,632)  | 2 <sup>nd</sup> (1,469) |
| infarct  | 3 <sup>rd</sup> (4,346)  | 3 <sup>rd</sup> (3,065)  | 3 <sup>rd</sup> (1,281) |
| focal    | 4 <sup>th</sup> (3,110)  | 4 <sup>th</sup> (2,217)  | 6 <sup>th</sup> (959)   |
| diffus   | 5 <sup>th</sup> (3,093)  | 5 <sup>th</sup> (2,134)  | 4 <sup>th</sup> (899)   |
| old      | 6 <sup>th</sup> (2,959)  | 6 <sup>th</sup> (2,095)  | 7 <sup>th</sup> (893)   |
| small    | 7 <sup>th</sup> (2,878)  | 7 <sup>th</sup> (1,979)  | 5 <sup>th</sup> (864)   |
| multipl  | 8 <sup>th</sup> (2,598)  | 8 <sup>th</sup> (1,803)  | 8 <sup>th</sup> (795)   |
| matter   | 9 <sup>th</sup> (2,299)  | 9 <sup>th</sup> (1,625)  | 9 <sup>th</sup> (674)   |
| white    | 10 <sup>th</sup> (2,233) | 10 <sup>th</sup> (1,574) | 11 <sup>th</sup> (668)  |
| restrict | 11 <sup>th</sup> (2,192) | 12 <sup>th</sup> (1,531) | 10 <sup>th</sup> (659)  |
| stenosi  | 12 <sup>th</sup> (2,150) | 11 <sup>th</sup> (1,524) | 12 <sup>th</sup> (619)  |
| proxim   | 13 <sup>th</sup> (1,822) | 13 <sup>th</sup> (1,316) | 14 <sup>th</sup> (522)  |
| mca      | 14 <sup>th</sup> (1,770) | 14 <sup>th</sup> (1,273) | 15 <sup>th</sup> (506)  |
| acut     | 15 <sup>th</sup> (1,705) | 15 <sup>th</sup> (1,183) | 13 <sup>th</sup> (497)  |

Numbers in the parentheses represents the frequency of the word tokens that were repeated in the corresponding dataset.

**Supplemental Table S2.** Comparison of most frequently used tokens in training, test and whole dataset.

| Order | Whole dataset |        | Training dataset |        | Test dataset |        |
|-------|---------------|--------|------------------|--------|--------------|--------|
|       | tokens        | number | tokens           | number | tokens       | Number |
| 1     | left          | 5,236  | left             | 3,720  | left         | 1,516  |
| 2     | right         | 5,101  | right            | 3,632  | right        | 1,469  |
| 3     | infarct       | 4,346  | infarct          | 3,065  | infarct      | 1,281  |
| 4     | focal         | 3,110  | focal            | 2,217  | diffuse      | 959    |
| 5     | diffuse       | 3,093  | diffuse          | 2,134  | small        | 899    |
| 6     | old           | 2,959  | old              | 2,095  | focal        | 893    |
| 7     | small         | 2,878  | small            | 1,979  | old          | 864    |
| 8     | multipl       | 2,598  | multipl          | 1,803  | multipl      | 795    |
| 9     | matter        | 2,299  | matter           | 1,625  | matter       | 674    |
| 0     | white         | 2,233  | white            | 1,574  | restrict     | 668    |
| 11    | restrict      | 2,192  | stenosi          | 1,531  | white        | 659    |
| 12    | stenosi       | 2,150  | restrict         | 1,524  | stenosi      | 619    |
| 13    | proxim        | 1,822  | proxim           | 1,316  | acut         | 522    |
| 14    | mca           | 1,770  | mca              | 1,273  | proxim       | 506    |
| 15    | acut          | 1,705  | acut             | 1,183  | mca          | 497    |
| 16    | mra           | 1,565  | mra              | 1,101  | mra          | 464    |
| 17    | deep          | 1,496  | seep             | 1,034  | deep         | 462    |
| 18    | ica           | 1,422  | ica              | 1,001  | ica          | 421    |
| 19    | ganglia       | 1,394  | ganglia          | 9,80   | basal        | 415    |
| 20    | basal         | 1,391  | basal            | 976    | ganglia      | 414    |

Numbers represents the frequency of the stemming word tokens that were repeated in the corresponding dataset.
